# Supplementary material
Source: Royal Society of Chemistry journal article supplement (doi:10.1039/d6cp01378c)
Supplement: d6cp01378c1.pdf [file d6cp01378c1.pdf]

## Supporting Information

### Turning Up Chirality: Hydrostatic Pressure Boosts Circularly Polarized Luminescence in Europium Complexes

Ayaka Miyoshi,<sup>a</sup> Hitoha Abe,<sup>b</sup> Honoka Akiyama,<sup>a</sup> Keisuke Yoshida,<sup>a</sup> and Yoshitane Imai<sup>\*a</sup>

<sup>[a]</sup> Graduate School of Science and Engineering, Kindai University  
3-4-1 Kowakae, Higashi-Osaka, Osaka 577-8502, Japan.

<sup>[b]</sup> Department of Applied Chemistry, Faculty of Science and Engineering,  
Kindai University, 3-4-1 Kowakae, Higashi-Osaka, Osaka 577-8502, Japan.

Corresponding author email: y-imai@apch.kindai.ac.jp. Experimental procedures and High-pressure CPL and PL measurement system

A high-pressure optical cell PCI-500 system, manufactured by Shin Corporation, was used for experimental purposes (Fig. S1). This high-pressure optical cell system used polycrystalline yttrium aluminium garnet ( $Y_3Al_5O_{12}$ , YAG) as pressure-resistant optical windows. The PL and CPL spectra were measured using a JASCO (Hachioji, Tokyo, Japan) CPL-300 spectrofluoropolarimeter at a scattering angle of  $0^\circ$ . Excitation was performed with unpolarized monochromatic light (bandwidth = 10 nm) at 25 °C. Emission bandwidth was also 10 nm.

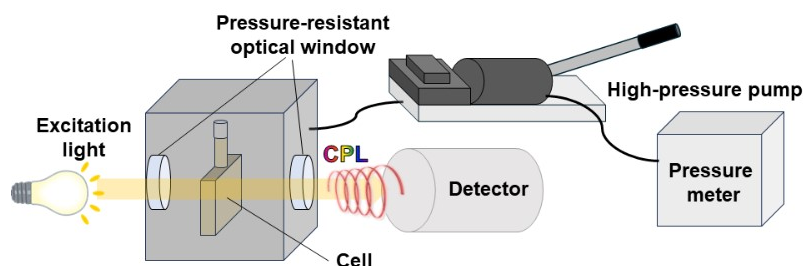

Fig. S1. Illustration of the universal high-pressure CPL and PL measurement system.

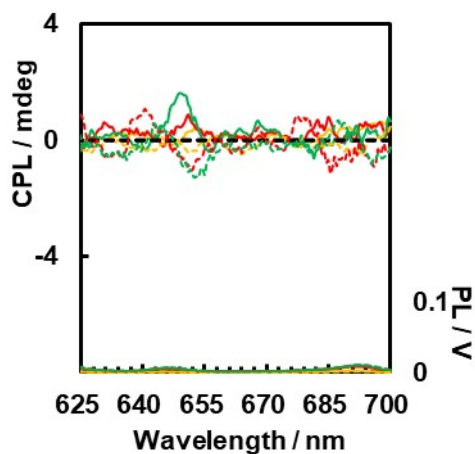

**Fig. S2.** CPL (top) and PL (bottom) spectra of (*R*)-BINAP–Eu(III)(hfa)<sub>3</sub> (solid lines) and (*S*)-BINAP–Eu(III)(hfa)<sub>3</sub> (dotted lines) in a chloroform solution ( $1.0 \times 10^{-3}$  M). Yellow lines: ambient pressure (0.1 MPa); red lines: hydrostatic pressure (50 MPa); green lines: hydrostatic pressure (100 MPa).

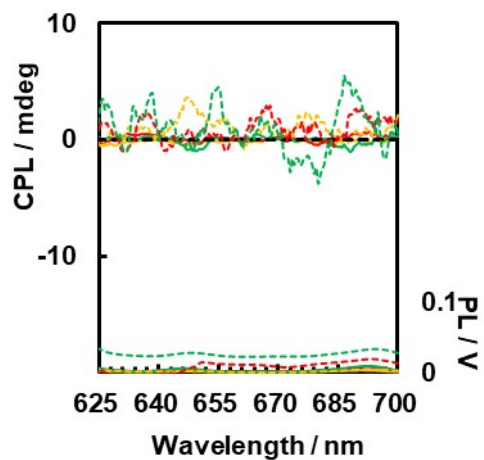

**Fig. S3.** CPL (top) and PL (bottom) spectra of (*R,R*)-QuinoxP–Eu(III)(hfa)<sub>3</sub> (solid lines) and (*S,S*)-QuinoxP–Eu(III)(hfa)<sub>3</sub> (dotted lines) in a chloroform solution ( $1.0 \times 10^{-3}$  M). Yellow lines: ambient pressure (0.1 MPa); red lines: hydrostatic pressure (50 MPa); green lines: hydrostatic pressure (100 MPa).
